# Supplementary material
Source: publisher figshare collection journal article supplement (https://tandf.figshare.com/articles/dataset/_/7315343)
Supplement: Supplementary file 1 [file 1]

Supplemental Material for "Push it to the limit:  
comparing periodic and local approaches to density  
functional theory for intermolecular interactions"

J. Witte, J.B. Neaton, M. Head-Gordon

# Contents

|          |                                                        |          |
|----------|--------------------------------------------------------|----------|
| <b>1</b> | <b>Overview</b>                                        | <b>3</b> |
| <b>2</b> | <b>Tables</b>                                          | <b>4</b> |
| 2.1      | Numbering convention . . . . .                         | 4        |
| <b>3</b> | <b>Figures</b>                                         | <b>5</b> |
| 3.1      | Convergence with wavefunction kinetic energy . . . . . | 5        |
| 3.2      | Convergence with box size . . . . .                    | 6        |
| 3.2.1    | SPW92 without dipole correction . . . . .              | 6        |
| 3.2.2    | SPW92 with Makov-Payne correction . . . . .            | 7        |
| 3.2.3    | SPW92 with Martyna-Tuckerman correction . . . . .      | 8        |
| 3.2.4    | PBE with Martyna-Tuckerman correction . . . . .        | 9        |
| 3.3      | Convergence with vacuum distance . . . . .             | 10       |

# 1 Overview

This document contains the supplementary material for the journal article "Push it to the limit: comparing periodic and local approaches to density functional theory for intermolecular interactions."

Herein we provide a handful of supplementary figures mentioned in the text.

There is also an Excel file (binding\_energies.xls) that contains raw binding energies across the S22 dataset. This data has not been reproduced within this document.

## 2 Tables

### 2.1 Numbering convention

| System Number | System Name                          |
|---------------|--------------------------------------|
| 1             | Ammonia dimer                        |
| 2             | Water dimer                          |
| 3             | Formic acid dimer                    |
| 4             | Formamide dimer                      |
| 5             | Uracil dimer h-bonded                |
| 6             | 2-pyridoxine 2-aminopyridine complex |
| 7             | Adenine thymine Watson-Crick complex |
| 8             | Methane dimer                        |
| 9             | Ethene dimer                         |
| 10            | Benzene - Methane complex            |
| 11            | Benzene dimer parallel displaced     |
| 12            | Pyrazine dimer                       |
| 13            | Uracil dimer stack                   |
| 14            | Indole benzene complex stack         |
| 15            | Adenine thymine complex stack        |
| 16            | Ethene ethyne complex                |
| 17            | Benzene water complex                |
| 18            | Benzene ammonia complex              |
| 19            | Benzene HCN complex                  |
| 20            | Benzene dimer T-shaped               |
| 21            | Indole benzene T-shape complex       |
| 22            | Phenol dimer                         |

Table 1: Numbering convention of S22 used to abbreviate systems in the remainder of the SM.

### 3 Figures

#### 3.1 Convergence with wavefunction kinetic energy

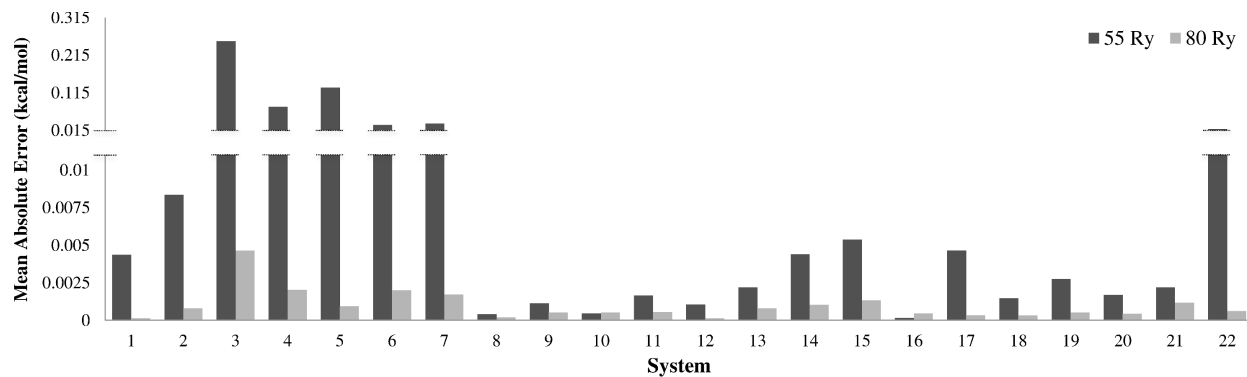

Figure 1: Convergence of SPW92 plane wave binding energies with respect to wavefunction kinetic energy cutoff. Errors are expressed relative to binding energies computed with a 110 Ry cutoff.

## 3.2 Convergence with box size

### 3.2.1 SPW92 without dipole correction

|    | Box Size      |               |               |               |               |        |
|----|---------------|---------------|---------------|---------------|---------------|--------|
|    | 20 Å          | 25 Å          | 30 Å          | 35 Å          | 40 Å          | 45 Å   |
| 1  | <b>-0.027</b> | <b>-0.009</b> | -0.004        | -0.002        | -0.001        | -0.001 |
| 2  | <b>0.012</b>  | 0.003         | 0.001         | 0.000         | 0.000         | 0.000  |
| 3  | <b>-0.057</b> | <b>-0.017</b> | -0.007        | -0.003        | -0.002        | -0.001 |
| 4  | <b>-0.161</b> | <b>-0.059</b> | <b>-0.026</b> | <b>-0.013</b> | -0.008        | -0.005 |
| 5  | <b>-1.000</b> | <b>-0.167</b> | <b>-0.054</b> | <b>-0.024</b> | <b>-0.012</b> | -0.007 |
| 6  | <b>-0.181</b> | <b>-0.045</b> | <b>-0.017</b> | -0.008        | -0.005        | -0.003 |
| 7  | <b>-0.914</b> | <b>-0.179</b> | <b>-0.052</b> | <b>-0.021</b> | <b>-0.010</b> | -0.005 |
| 8  | 0.000         | 0.000         | 0.000         | 0.000         | 0.000         | 0.000  |
| 9  | -0.001        | 0.000         | 0.000         | 0.000         | 0.000         | 0.000  |
| 10 | -0.002        | 0.000         | 0.000         | 0.000         | 0.000         | 0.000  |
| 11 | 0.002         | 0.000         | 0.000         | 0.000         | 0.000         | 0.000  |
| 12 | <b>0.025</b>  | 0.006         | 0.002         | 0.001         | 0.000         | 0.000  |
| 13 | <b>-0.186</b> | <b>-0.052</b> | <b>-0.020</b> | <b>-0.009</b> | -0.005        | -0.003 |
| 14 | <b>-0.029</b> | -0.007        | -0.002        | -0.001        | 0.000         | 0.000  |
| 15 | <b>-0.139</b> | <b>-0.042</b> | <b>-0.017</b> | -0.008        | -0.005        | -0.003 |
| 16 | 0.009         | 0.001         | 0.000         | 0.000         | 0.000         | 0.000  |
| 17 | <b>-0.017</b> | -0.002        | 0.000         | 0.000         | 0.000         | 0.000  |
| 18 | <b>-0.016</b> | -0.003        | -0.001        | 0.000         | 0.000         | 0.000  |
| 19 | <b>-0.014</b> | 0.002         | 0.002         | 0.002         | 0.001         | 0.001  |
| 20 | <b>0.015</b>  | 0.002         | 0.001         | 0.000         | 0.000         | 0.000  |
| 21 | <b>0.017</b>  | 0.007         | 0.004         | 0.002         | 0.001         | 0.001  |
| 22 | <b>0.052</b>  | <b>0.015</b>  | 0.007         | 0.003         | 0.002         | 0.001  |

Figure 2: Convergence of SPW92 plane wave binding energies with respect to box size. The number in each cell corresponds to the change in binding energy (in kcal/mol) on increasing the box size by 5 Å to the listed size. Errors greater in magnitude than 0.009 kcal/mol are bold-faced and colored, with the cell color corresponding to the type of interaction. All calculations utilize a wavefunction kinetic energy cutoff of 80 Ry.

## 3.2.2 SPW92 with Makov-Payne correction

|        |    | Box Size      |               |               |               |        |
|--------|----|---------------|---------------|---------------|---------------|--------|
|        |    | 20 Å          | 25 Å          | 30 Å          | 35 Å          | 40 Å   |
| System | 1  | -0.002        | 0.000         | 0.000         | 0.000         | 0.000  |
|        | 2  | <b>0.012</b>  | 0.003         | 0.001         | 0.000         | 0.000  |
|        | 3  | <b>-0.022</b> | -0.004        | -0.001        | 0.000         | 0.000  |
|        | 4  | <b>0.014</b>  | 0.003         | 0.001         | 0.000         | 0.000  |
|        | 5  | <b>-0.775</b> | <b>-0.088</b> | <b>-0.019</b> | -0.006        | -0.002 |
|        | 6  | <b>-0.084</b> | <b>-0.011</b> | -0.003        | -0.001        | 0.000  |
|        | 7  | <b>-0.790</b> | <b>-0.139</b> | <b>-0.035</b> | <b>-0.012</b> | -0.005 |
|        | 8  | 0.000         | 0.000         | 0.000         | 0.000         | 0.000  |
|        | 9  | -0.001        | 0.000         | 0.000         | 0.000         | 0.000  |
|        | 10 | -0.002        | 0.000         | 0.000         | 0.000         | 0.000  |
|        | 11 | 0.002         | 0.000         | 0.000         | 0.000         | 0.000  |
|        | 12 | <b>0.025</b>  | 0.006         | 0.002         | 0.001         | 0.000  |
|        | 13 | <b>-0.101</b> | <b>-0.021</b> | -0.006        | -0.002        | -0.001 |
|        | 14 | <b>-0.023</b> | -0.005        | -0.001        | 0.000         | 0.000  |
|        | 15 | <b>-0.040</b> | -0.007        | -0.002        | -0.001        | 0.000  |
|        | 16 | 0.008         | 0.001         | 0.000         | 0.000         | 0.000  |
|        | 17 | <b>-0.027</b> | -0.005        | -0.002        | -0.001        | 0.000  |
|        | 18 | <b>-0.019</b> | -0.004        | -0.001        | 0.000         | 0.000  |
|        | 19 | <b>-0.051</b> | <b>-0.010</b> | -0.003        | -0.001        | 0.000  |
|        | 20 | <b>0.014</b>  | 0.001         | 0.000         | 0.000         | 0.000  |
|        | 21 | <b>-0.015</b> | -0.005        | -0.001        | 0.000         | 0.000  |
|        | 22 | 0.004         | -0.001        | 0.000         | 0.000         | 0.000  |

Figure 3: Convergence of SPW92 plane wave binding energies employing the Makov-Payne dipole correction with respect to box size. For further details, see Figure 2.

## 3.2.3 SPW92 with Martyna-Tuckerman correction

|        |    | Box Size       |               |               |       |       |
|--------|----|----------------|---------------|---------------|-------|-------|
|        |    | 20 Å           | 25 Å          | 30 Å          | 35 Å  | 40 Å  |
| System | 1  | -0.001         | 0.000         | 0.000         | 0.000 | 0.000 |
|        | 2  | 0.000          | 0.000         | 0.000         | 0.000 | 0.000 |
|        | 3  | <b>-0.026</b>  | 0.000         | 0.000         | 0.000 | 0.000 |
|        | 4  | <b>-0.077</b>  | 0.000         | 0.000         | 0.000 | 0.000 |
|        | 5  | <b>17.441</b>  | <b>-0.086</b> | <b>-0.449</b> | 0.000 | 0.000 |
|        | 6  | <b>24.089</b>  | <b>-1.487</b> | -0.003        | 0.000 | 0.000 |
|        | 7  | <b>34.511</b>  | <b>3.778</b>  | <b>-0.233</b> | 0.000 | 0.000 |
|        | 8  | <b>-0.029</b>  | 0.000         | 0.000         | 0.000 | 0.000 |
|        | 9  | <b>-0.045</b>  | 0.000         | 0.000         | 0.000 | 0.000 |
|        | 10 | <b>-0.028</b>  | 0.000         | 0.000         | 0.000 | 0.000 |
|        | 11 | <b>-1.356</b>  | 0.000         | 0.000         | 0.000 | 0.000 |
|        | 12 | <b>-0.199</b>  | 0.000         | 0.000         | 0.000 | 0.000 |
|        | 13 | <b>-0.151</b>  | 0.001         | 0.000         | 0.000 | 0.000 |
|        | 14 | <b>-0.559</b>  | 0.000         | 0.000         | 0.000 | 0.000 |
|        | 15 | <b>-4.723</b>  | -0.001        | 0.000         | 0.000 | 0.000 |
|        | 16 | <b>-0.500</b>  | 0.000         | 0.000         | 0.000 | 0.000 |
|        | 17 | -0.005         | 0.000         | 0.000         | 0.000 | 0.000 |
|        | 18 | <b>-0.017</b>  | 0.000         | 0.000         | 0.000 | 0.000 |
|        | 19 | <b>-0.168</b>  | 0.000         | 0.000         | 0.000 | 0.000 |
|        | 20 | <b>-7.602</b>  | <b>-0.039</b> | 0.000         | 0.000 | 0.000 |
|        | 21 | <b>-13.155</b> | <b>-0.221</b> | 0.000         | 0.000 | 0.000 |
|        | 22 | <b>1.497</b>   | <b>-0.490</b> | 0.000         | 0.000 | 0.000 |

Figure 4: Convergence of SPW92 plane wave binding energies employing the Martyna-Tuckerman dipole correction with respect to box size. For further details, see Figure 2.



## 3.2.4 PBE with Martyna-Tuckerman correction

|        |    | Box Size       |               |               |        |        |
|--------|----|----------------|---------------|---------------|--------|--------|
|        |    | 20 Å           | 25 Å          | 30 Å          | 35 Å   | 40 Å   |
| System | 1  | -0.001         | 0.000         | 0.000         | 0.000  | 0.000  |
|        | 2  | 0.000          | 0.000         | 0.000         | 0.000  | 0.000  |
|        | 3  | <b>-0.027</b>  | 0.000         | 0.000         | -0.003 | 0.003  |
|        | 4  | <b>-0.079</b>  | 0.000         | 0.000         | -0.001 | 0.001  |
|        | 5  | <b>17.308</b>  | <b>-0.096</b> | <b>-0.443</b> | 0.002  | -0.002 |
|        | 6  | <b>23.791</b>  | <b>-1.502</b> | -0.003        | -0.001 | 0.001  |
|        | 7  | <b>34.248</b>  | <b>3.754</b>  | <b>-0.237</b> | 0.001  | -0.001 |
|        | 8  | <b>-0.029</b>  | 0.000         | 0.000         | 0.000  | 0.000  |
|        | 9  | <b>-0.045</b>  | 0.000         | 0.000         | 0.000  | 0.000  |
|        | 10 | <b>-0.028</b>  | 0.000         | 0.000         | 0.000  | 0.000  |
|        | 11 | <b>-1.332</b>  | 0.000         | 0.000         | 0.000  | 0.000  |
|        | 12 | <b>-0.200</b>  | 0.000         | 0.000         | 0.000  | 0.000  |
|        | 13 | <b>-0.153</b>  | 0.001         | 0.000         | 0.000  | 0.001  |
|        | 14 | <b>-0.555</b>  | 0.000         | 0.000         | 0.000  | 0.000  |
|        | 15 | <b>-4.681</b>  | -0.001        | 0.000         | 0.000  | 0.000  |
|        | 16 | <b>-0.497</b>  | 0.000         | 0.000         | 0.000  | 0.000  |
|        | 17 | -0.005         | 0.000         | 0.000         | 0.000  | 0.000  |
|        | 18 | <b>-0.017</b>  | 0.000         | 0.000         | 0.000  | 0.000  |
|        | 19 | <b>-0.167</b>  | 0.000         | 0.000         | 0.000  | 0.000  |
|        | 20 | <b>-7.624</b>  | <b>-0.039</b> | 0.000         | 0.000  | 0.000  |
|        | 21 | <b>-13.430</b> | <b>-0.219</b> | 0.000         | 0.000  | 0.000  |
|        | 22 | <b>1.334</b>   | <b>-0.488</b> | 0.000         | 0.000  | 0.000  |

Figure 5: Convergence of PBE plane wave binding energies employing the Martyna-Tuckerman dipole correction with respect to box size. For further details, see Figure 2.

### 3.3 Convergence with vacuum distance

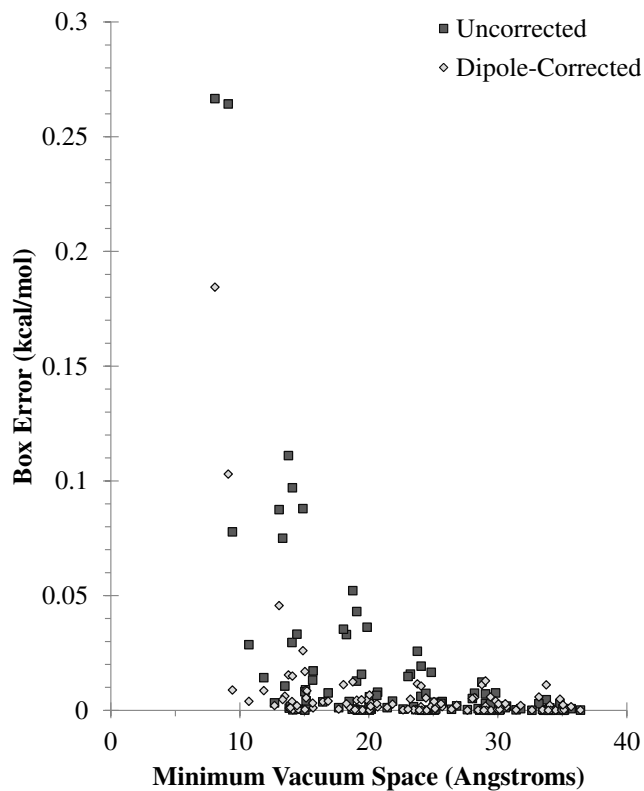

Figure 6: Convergence of SPW92 plane wave binding energies with and without the Makov-Payne dipole correction with respect to the closest system-image contact distances.
